# Supplementary material
Source: PubMed Central journal article supplement (PMC4430428)
Supplement: NIHMS642098-supplement-supplement_1.pdf [file NIHMS642098-supplement-supplement_1.pdf]

**Supplementary Table 1. Exome sequencing coverage.**

|                           | <u>101-1</u> | <u>102-1</u> | <u>103-1</u> |
|---------------------------|--------------|--------------|--------------|
| Mean coverage:            | 50x          | 90x          | 67x          |
| Median coverage:          | 42x          | 77x          | 54x          |
| Number of reads:          | 50M          | 82M          | 69M          |
| Bases covered $\geq$ 8x:  | 93%          | 96%          | 94%          |
| Bases covered $\geq$ 20x: | 79%          | 91%          | 84%          |

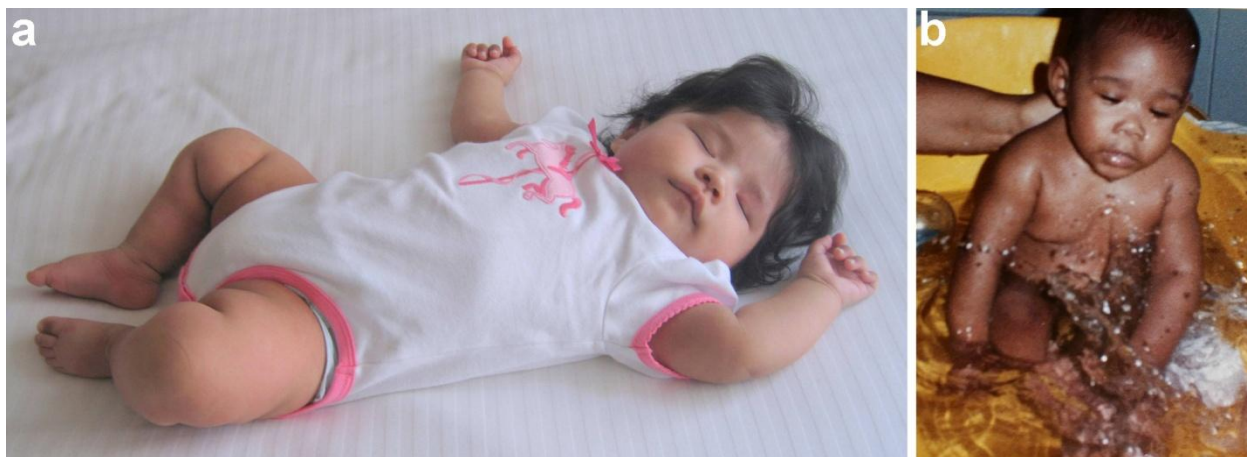

**Supplementary Figure 1. EKVP due to *GJA1* mutation has onset in late infancy.**

(a) Subject 102-1 is seen at 6 months of age and does not show evidence of skin disease. (b) Subject 103-1 is seen at 3 months of age and does not show evidence of skin disease. In both cases, skin lesions began to appear later in infancy with darkening, scaling, and erythema worsening over time.

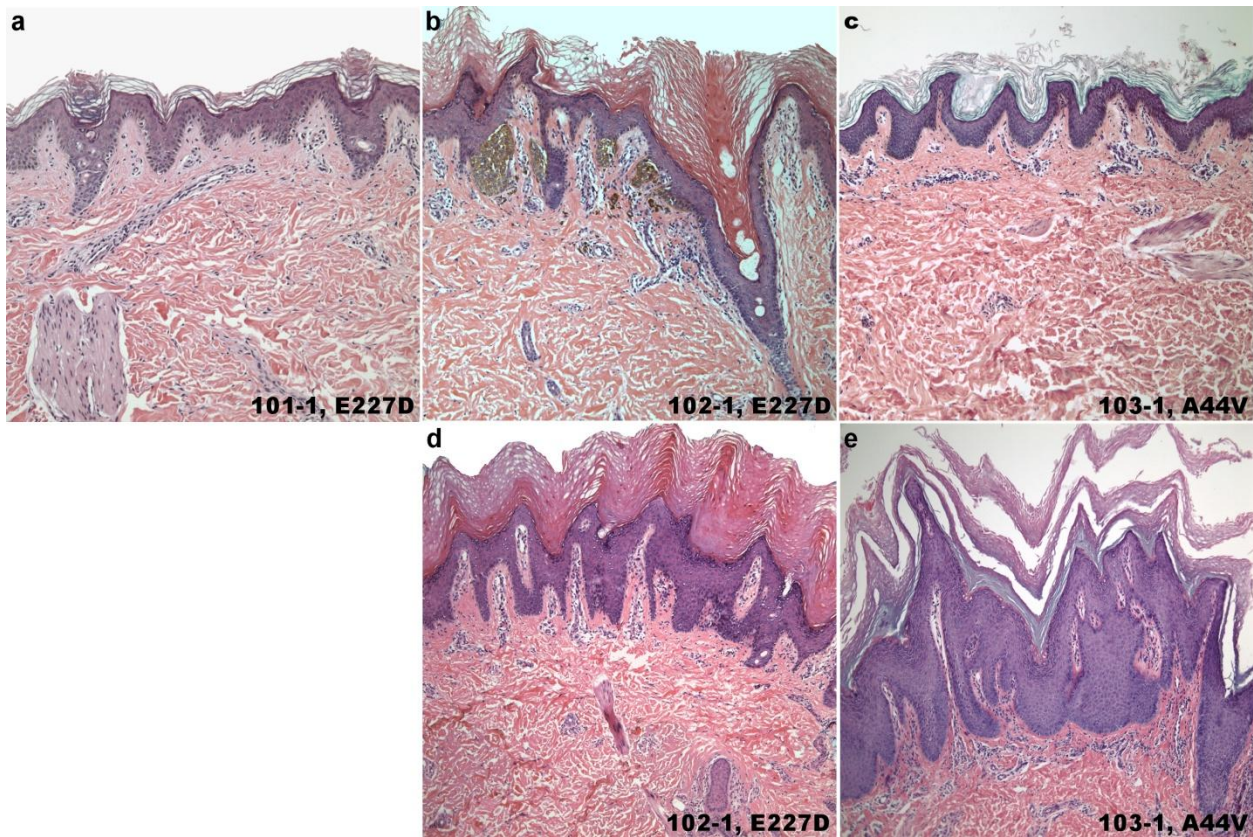

**Supplementary Figure 2. Histology of EKVP due to *GJA1* mutation.**

10X images of tissue sections from less severely affected (a-c) and more severely affected (d,e) skin are shown from EKVP affected individuals, except 101-1, from whom only less severely affected skin was available. (a) Biopsy of the right thigh of subject 101-1 shows mild papillomatosis, basket weave orthokeratosis, and follicular plugging. (b) Biopsy of a compound nevus on the lower back of subject 102-1 shows acanthosis, papillomatosis, orthohyperkeratosis, and follicular plugging as junctional nests of melanocytes. (c) Biopsy from the flank of subject 103-1 shows papillomatosis and orthohyperkeratosis. (d) More severely affected skin on the upper thigh from subject 102-1 shows acanthosis, hypergranulosis, and compact orthohyperkeratosis. (e) Similarly, more severely affected skin on the back of subject 103-1 shows marked acanthosis, hypergranulosis, and compact orthohyperkeratosis.

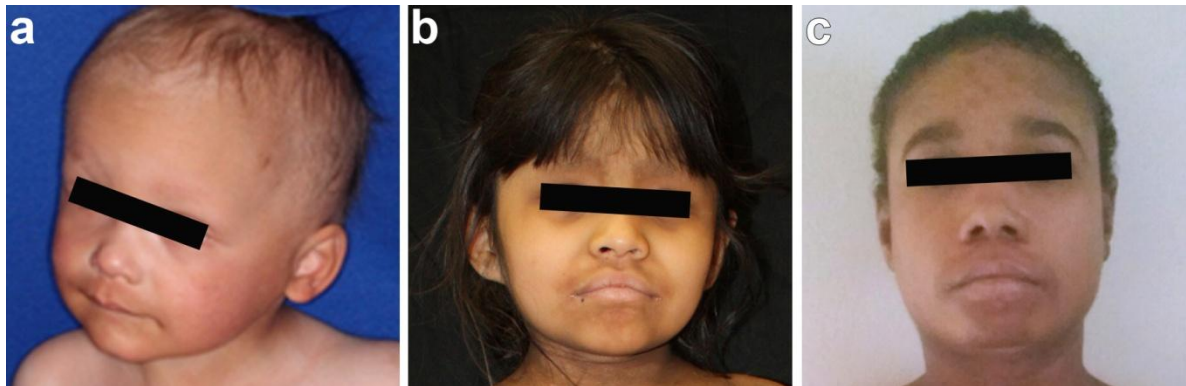

**Supplementary Figure 3. Facial features of subjects with EKVP due to *GJA1* mutation.**

Subjects show hyperkeratosis around the eyes and mouth, and periorificial darkening. All subjects have hair with density appropriate to their age. There is no evidence of nasal or eye abnormalities or other craniofacial defects typically seen in ODDD. (a) 101-1. (b) 102-1. (c) 103-1.

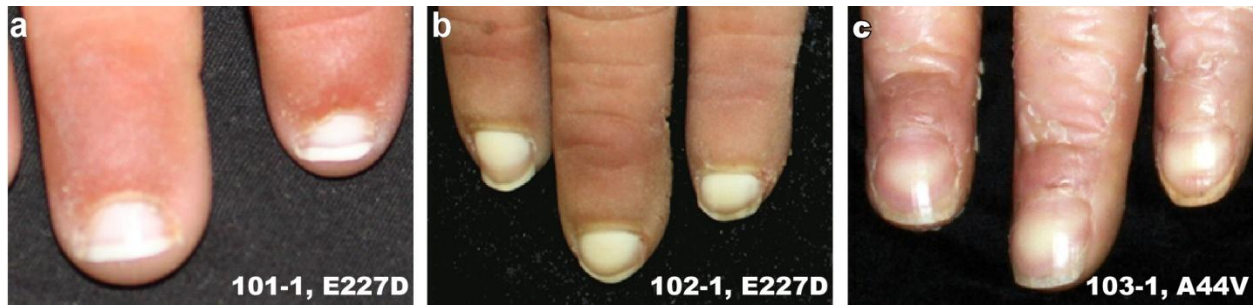

**Supplementary Figure 4. Enlarged white lunulae in EKVP subjects with *GJA1* mutation.**

Close-up images of the nails of affected individuals are shown. In subjects 101-1 and 102-1, who bear the same E227D *GJA1* mutation, there are enlarged, porcelain-white lunulae extending from the cuticle to the free edge of the nail (**a**, **b**). In subject 103-1, who has an A44V mutation, enlarged white lunulae are present and extend to within 2mm of the nail free edge (**c**).

101-1

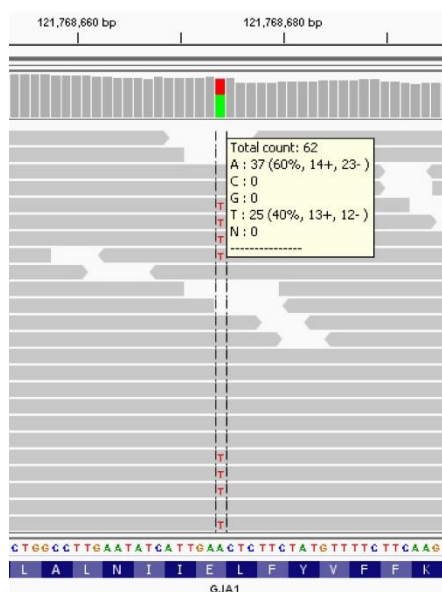

102-1

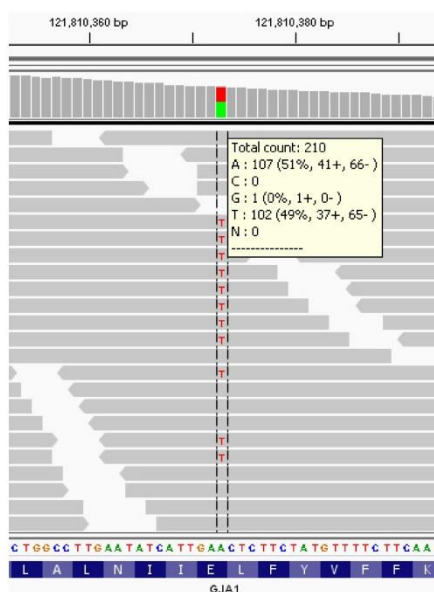

103-1

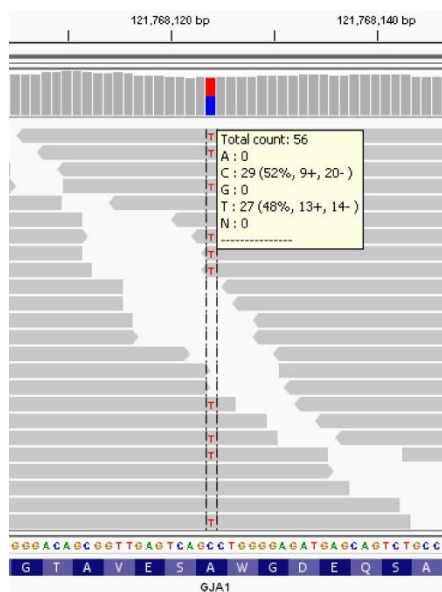

### Supplementary Figure 5. Identification of *GJA1* mutations by exome sequencing.

Screen captures from the Integrative Genomics Viewer (IGV) depict aligned reads (gray arrows) from exome sequencing of three subjects. For each, base position on chromosome 6 is shown at the top (hg19 for 101-1 and 103-1, hg18 for 102-1), wild-type DNA and protein sequence is at the bottom, and mutant bases are in colored letters within the aligned reads. The total number of reads at the mutant position and the base count at that position are shown in the yellow box. Mutations are p.E227D, c.A681T (subjects 101-1 and 102-1) and p.A44V, c.C131T (subject 103-1) (NCBI RefSeq NM\_000165).

|                     |                                                                                                                         |                                               |                           |     |
|---------------------|-------------------------------------------------------------------------------------------------------------------------|-----------------------------------------------|---------------------------|-----|
| GJA1_Cx43_human     | MGDWSALGKLLDKVQAYSTAGGK                                                                                                 | VWLSVLFIFRILLLGTAVESAWG                       | DEQSAFRCNTQQPG            | 60  |
| GJA1_Cx43_orangutan | MGDWSALGKLLDKVQAYSTAGGK                                                                                                 | VWLSVLFIFRILLLGTAVESAWG                       | DEQSAFRCNTQQPG            | 60  |
| GJA1_Cx43_dog       | MGDWSALGKLLDKVQAYSTAGGK                                                                                                 | VWLSVLFIFRILLLGTAVESAWG                       | DEQSAFRCNTQQPG            | 60  |
| GJA1_Cx43_elephant  | MGDWSALGKLLDKVQAYSTAGGK                                                                                                 | VWLSVLFIFRILLLGTAVESAWG                       | DEQSAFRCNTQQPG            | 60  |
| GJA1_Cx43_mouse     | MGDWSALGKLLDKVQAYSTAGGK                                                                                                 | VWLSVLFIFRILLLGTAVESAWG                       | DEQSAFRCNTQQPG            | 60  |
| GJA1_Cx43_chicken   | MGDWSALGKLLDKVQAYSTAGGK                                                                                                 | VWLSVLFIFRILLLGTAVESAWG                       | DEQSAFRCNTQQPG            | 60  |
| GJA1_Cx43_frog      | MGDWSALGRLLDKVQAYSTAGGK                                                                                                 | VWLSVLFIFRILLLGTAVESAWG                       | DEQSAFV CNTQQPG           | 60  |
| GJA1_Cx43_zebrafish | MGDWSALGRLLDKVQAYSTAGGK                                                                                                 | VWLSVLFIFRILLV LGTAVESAWG                     | DEQSAFK CNTQQPG           | 60  |
|                     |                                                                                                                         |                                               |                           |     |
| GJA1_Cx43_human     | CENVCYDKSFPI SHVR                                                                                                       | FWVLQIIFVSVPTLLYL AHV FVY                     | MRKEEKL NKKEEELKVAQTDG    | 120 |
| GJA1_Cx43_orangutan | CENVCYDKSFPI SHVR                                                                                                       | FWVLQIIFVSVPTLLYL AHV FVY                     | MRKEEKL NKKEEELKVAQTDG    | 120 |
| GJA1_Cx43_dog       | CENVCYDKSFPI SHVR                                                                                                       | FWVLQIIFVSVPTLLYL AHV FVY                     | MRKEEKL NKKEEELKVAQTDG    | 120 |
| GJA1_Cx43_elephant  | CENVCYDKSFPI SHVR                                                                                                       | FWVLQIIFVSVPTLLYL AHV FVY                     | MRKEEKL NKKEEELKVAQTDG    | 120 |
| GJA1_Cx43_mouse     | CENVCYDKSFPI SHVR                                                                                                       | FWVLQIIFVSVPTLLYL AHV FVY                     | MRKEEKL NKKEEELKVAQTDG    | 120 |
| GJA1_Cx43_chicken   | CENVCYDKSFPI SHVR                                                                                                       | FWVLQIIFVSVPTLLYL AHV FVY                     | MRKEEKL NKREEEELKV V QNDG | 120 |
| GJA1_Cx43_frog      | CENVCYDKSFPI SHVR                                                                                                       | FWVLQIIFVSTPTLLYL AHV FVY                     | LMRKEEKLNRKKEEELKMV QNEG  | 120 |
| GJA1_Cx43_zebrafish | CENVCYDKSFPI SHVR                                                                                                       | FWVLQIIFVSTPTLLYL AHV FVY                     | LMRKEEKLNRKKEEELKVA QNDG  | 120 |
|                     |                                                                                                                         |                                               |                           |     |
| GJA1_Cx43_human     | VNVDMLHKQIEIKKFKYGI EEHGKVKMRGGLLRT                                                                                     | YIISILFKSIFEVAFLLIQWYIY                       | GFS                       | 180 |
| GJA1_Cx43_orangutan | ANVDMHLKQIEIKKFKYGI EEHGKVKMRGGLLRT                                                                                     | YIISILFKSIFEVAFLLIQWYIY                       | GFS                       | 180 |
| GJA1_Cx43_dog       | ANVDMHLKQIEIKKFKYGI EEHGKVKMRGGLLRT                                                                                     | YIISILFKSVFEVAFLLIQWYIY                       | GFS                       | 180 |
| GJA1_Cx43_elephant  | ANVDMHLKQIEIKKFKYGI EEHGKVKMRGGLLRT                                                                                     | YIISILFKSIFEVAFLLIQWYIY                       | GFS                       | 180 |
| GJA1_Cx43_mouse     | VNVEMLHKQIEIKKFKYGI EEHGKVKMRGGLLRT                                                                                     | YIISILFKSVFEVAFLLIQWYIY                       | GFS                       | 180 |
| GJA1_Cx43_chicken   | VNVDMLHKQIEIKKFKYGI EEHGKVKMRGGLLRT                                                                                     | YIISILFKSVFEVAFLLIQWYIY                       | GFS                       | 180 |
| GJA1_Cx43_frog      | GNVDMHLKQIEIKKFKYGL EEHGKVKMRGGLLRT                                                                                     | YIISILFKSVFEVGFIFIQWYMY                       | GFS                       | 180 |
| GJA1_Cx43_zebrafish | G D V E L H L K K I E L K K F K H G L E E H G K V K M R G S L L R T                                                     | Y I F S I I F K S I C E V V F L V I Q W Y L Y | G F S                     | 180 |
|                     |                                                                                                                         |                                               |                           |     |
| GJA1_Cx43_human     | LSAVYTCRDP CPHQVDCFLSRPTEKTI                                                                                            | FIIFMLVVSLSLALNIIELFYV                        | FFKGVKDRV                 | 240 |
| GJA1_Cx43_orangutan | LSAVYTCRDP CPHQVDCFLSRPTEKTI                                                                                            | FIIFMLVVSLSLALNIIELFYV                        | FFKGVKDRV                 | 240 |
| GJA1_Cx43_dog       | LSAVYTCRDP CPHQVDCFLSRPTEKTI                                                                                            | FIIFMLVVSLSLALNIIELFYV                        | FFKGVKDRV                 | 240 |
| GJA1_Cx43_elephant  | LSAVYTCRDP CPHQVDCFLSRPTEKTI                                                                                            | FIIFMLVVSLSLALNIIELFYV                        | FFKGVKDRV                 | 240 |
| GJA1_Cx43_mouse     | LSAVYTCRDP CPHQVDCFLSRPTEKTI                                                                                            | FIIFMLVVSLSLALNIIELFYV                        | FFKGVKDRV                 | 240 |
| GJA1_Cx43_chicken   | LSA I Y T C E R D P C P H R V D C F L S R P T E K T I                                                                   | F I V F M L V V S L S L A L N I I E L F Y V   | F F K G V K D R V         | 240 |
| GJA1_Cx43_frog      | LSA I Y T C R D P C P H Q V D C F L S R P T E K T I                                                                     | F I W F M L I V S I V S L A L N I I E L F Y V | T Y K S I K D G I         | 240 |
| GJA1_Cx43_zebrafish | LSAVYTCERTPCPHRVDCFLSRPTEKTI                                                                                            | FIIFMLVVSLSLALNIIELFYV                        | LFKR IKDRV                | 240 |
|                     |                                                                                                                         |                                               |                           |     |
| GJA1_Cx43_human     | KGKSDPYHATSGALSPA KDCGSKYAYFNGCSSPTAPLS PMSPPGYKLV TGDRNNSSCR N                                                         |                                               |                           | 300 |
| GJA1_Cx43_orangutan | KGKSDPYHATSGALSPA KDCGSKYAYFNGCSSPTAPLS PMSPPGYKLV TGDRNNSSCR N                                                         |                                               |                           | 300 |
| GJA1_Cx43_dog       | KGKSDPYHATSGPLSPSKDCGSKYAYFNGCSSPTAPLS PMSPPGYKLV TGDRNNSSCR N                                                          |                                               |                           | 300 |
| GJA1_Cx43_elephant  | KGKSDPYHATSGPLSPSKDCGSKYAYFNGCSSPTAPLS PMSPPGYKLV TGDRNNSSCR N                                                          |                                               |                           | 300 |
| GJA1_Cx43_mouse     | KGRSDPYHATSGPLSPSKDCGSKYAYFNGCSSPTAPLS PMSPPGYKLV TGDRNNSSCR N                                                          |                                               |                           | 300 |
| GJA1_Cx43_chicken   | KGKTDPY--HSGTMSPSKDCGSKYAYYNGCSSPTAPLS PMSPPGYKLV TGDRNNSSCR N                                                          |                                               |                           | 298 |
| GJA1_Cx43_frog      | KGK K D P Y S A T N D S V V P G K E C G S P K Y A Y F N G C S S P T A - - - P M S P P G Y K L V T G E R N P S S C R N   |                                               |                           | 297 |
| GJA1_Cx43_zebrafish | K - A D K T H I P T - - T L S T P K E L S T T K Y A Y Y N G C S S P T A P L S P M S P P G Y K L A T G E - R T N S C R N |                                               |                           | 296 |
|                     |                                                                                                                         |                                               |                           |     |
| GJA1_Cx43_human     | YNKQASEQNWANYSAEQNRMGQAGSTISNSHAQPFDFPDDNQNSKKLAAGHELQPLAIVD                                                            |                                               |                           | 360 |
| GJA1_Cx43_orangutan | YNKQASEQNWANYSAEQNRMGQAGSTISNSHAQPFDFPDDNQNSKKLAAGHELQPLAIVD                                                            |                                               |                           | 360 |
| GJA1_Cx43_dog       | YNKQASEQNWANYSAEQNRMGQAGSTISNSHAQPFDFPDDNQNSKKLAAGHELQPLAIVD                                                            |                                               |                           | 360 |
| GJA1_Cx43_elephant  | YNKQASEQNWANYSAEQNRMGQAGSTISNSHAQPFDFPDDNENSKKLA TGHELQPLAIVD                                                           |                                               |                           | 360 |
| GJA1_Cx43_mouse     | YNKQASEQNWANYSAEQNRMGQAGSTISNSHAQPFDFPDDSQNAKKVAAGHELQPLAIVD                                                            |                                               |                           | 360 |
| GJA1_Cx43_chicken   | YNKQASEQNWANYSAEQNRMGQAGSTISNSHAQPFDFADEHQNTKKLASGHELQPLTIVD                                                            |                                               |                           | 358 |
| GJA1_Cx43_frog      | YNKQASEQNWANYSAEQNRMGQAGSTISNTHAQPFDESDEHQNTKKMAPGHEMQPLTILD                                                            |                                               |                           | 357 |
| GJA1_Cx43_zebrafish | YNKQANEQNWANYS TEQNRNLGQNGSTISNSHAQA AFDYFDDTHEHKKLTPGHELQPLAIVD                                                        |                                               |                           | 356 |
|                     |                                                                                                                         |                                               |                           |     |
| GJA1_Cx43_human     | QRPSRRASSRASSRPRPDDLEI                                                                                                  |                                               |                           | 382 |
| GJA1_Cx43_orangutan | QRPSRRASSRASSRPRPDDLEI                                                                                                  |                                               |                           | 382 |
| GJA1_Cx43_dog       | QRPSRRASSRASSRPRPDDLEI                                                                                                  |                                               |                           | 382 |
| GJA1_Cx43_elephant  | QRPSRRASSRASSRPRPDDLEI                                                                                                  |                                               |                           | 382 |
| GJA1_Cx43_mouse     | QRPSRRASSRASSRPRPDDLEI                                                                                                  |                                               |                           | 382 |
| GJA1_Cx43_chicken   | QRPPSSRASSRASSRPRPDDLEI                                                                                                 |                                               |                           | 380 |
| GJA1_Cx43_frog      | QRPSRRASSRASSRPRPDDLEI                                                                                                  |                                               |                           | 379 |
| GJA1_Cx43_zebrafish | A R P C S R A S S R M S S R A R P D D L D V                                                                             |                                               |                           | 378 |

### Supplementary Figure 6. Human Cx43 and orthologs.

Transmembrane domains are outlined, and conserved residues are shaded gray. Cx43 mutation sites A44V and E227D are shaded red.
